# Supplementary material
Source: MDPI journal article supplement (https://www.mdpi.com/2073-4395/14/3/605)
Supplement: s1 [file s1]

# *Dianthus caryophyllus*

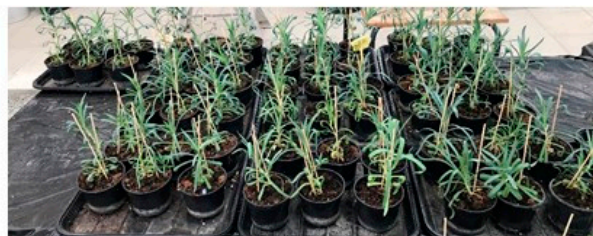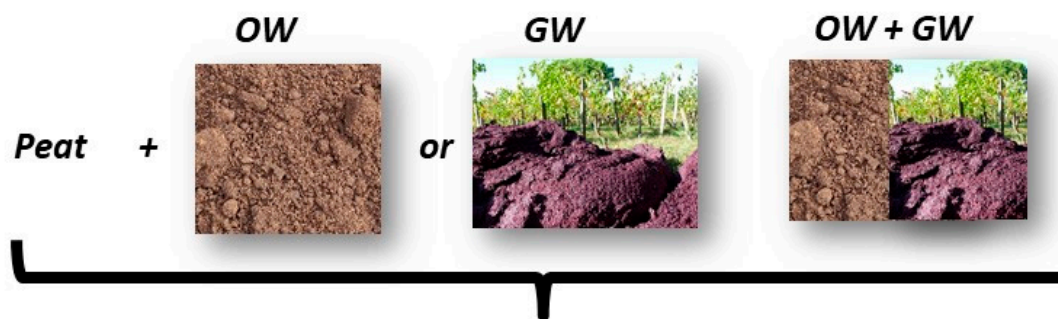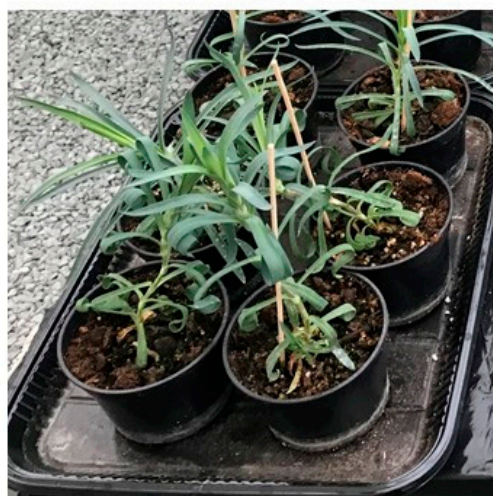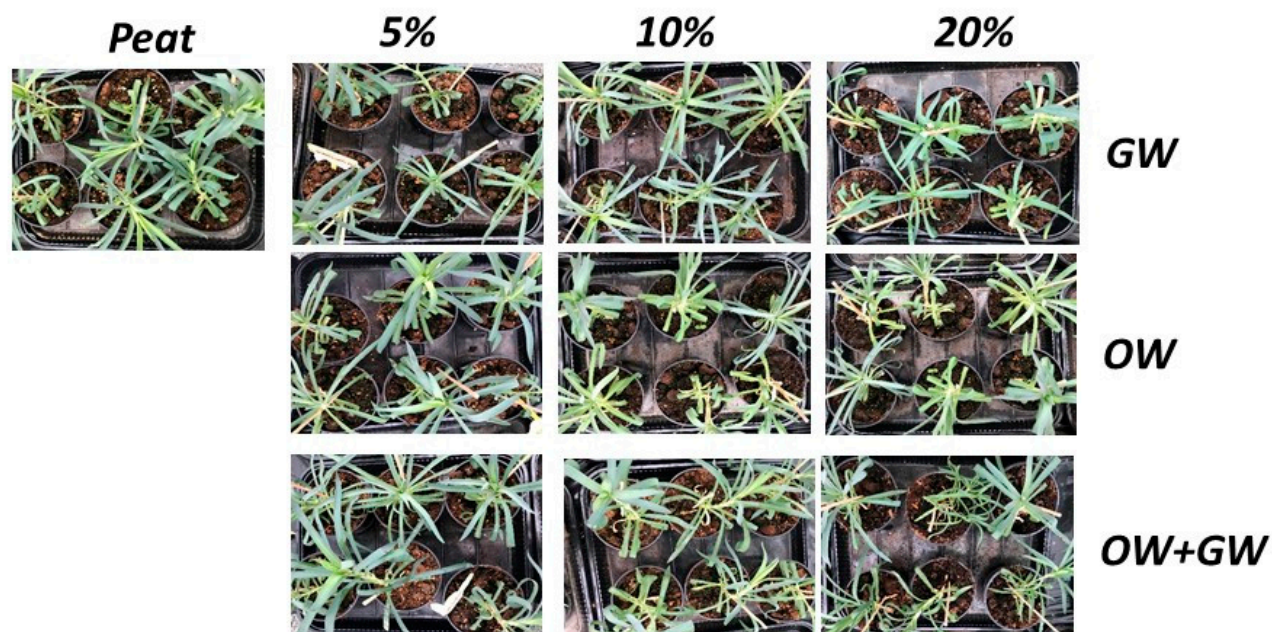

**Figure S1.** Experimental layout and representative images of plants grown in different growing media (peat, olive waste—OW, grape waste—GW and their mixtures).

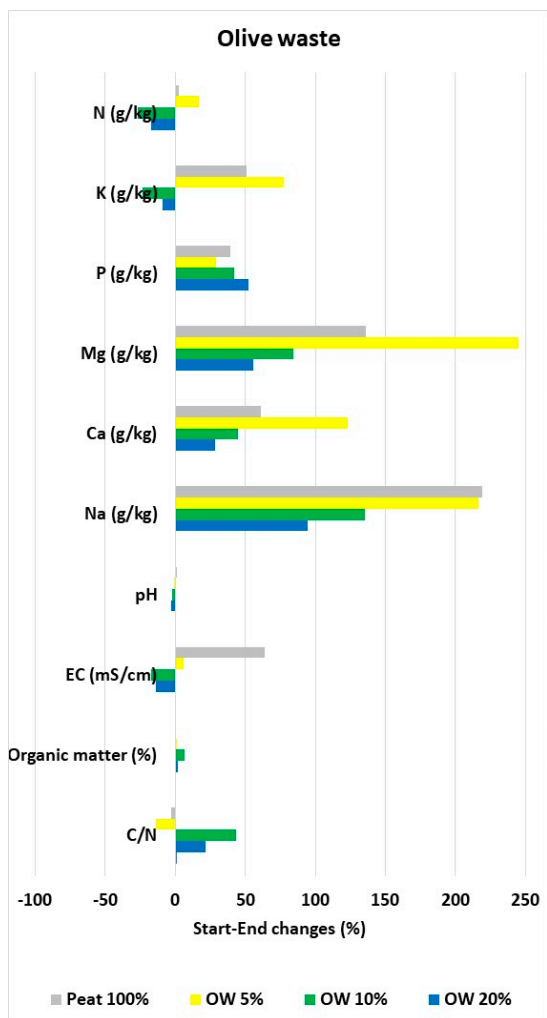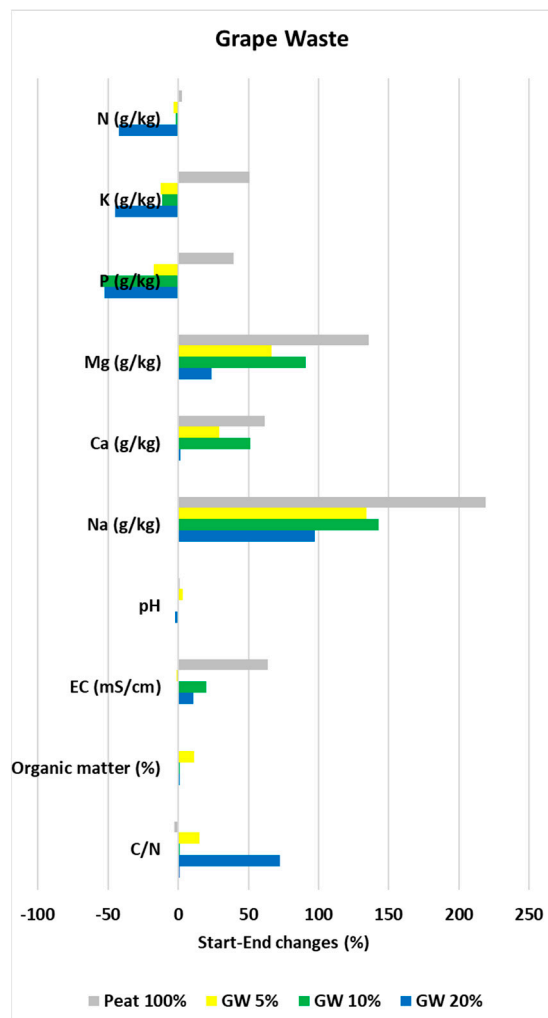

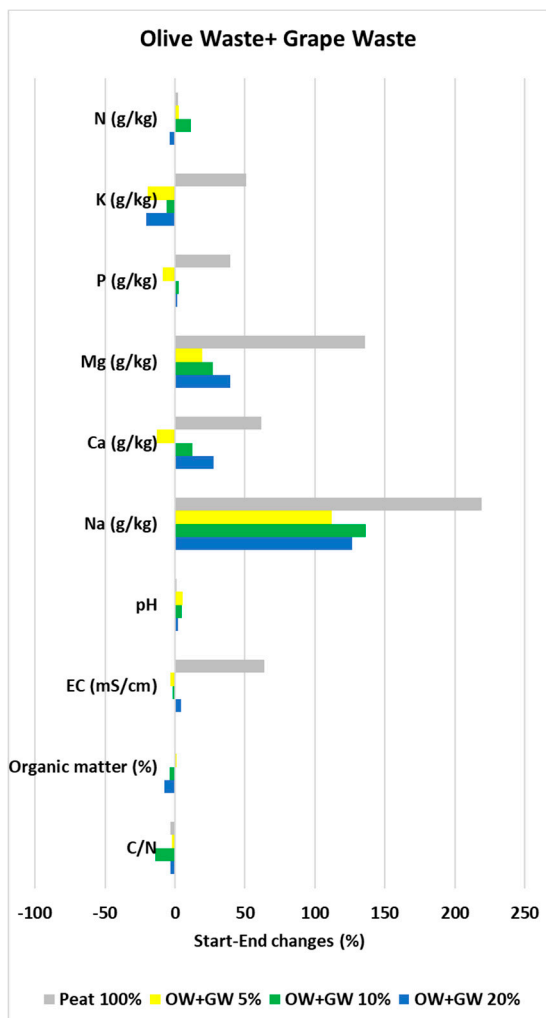

**Figure S2.** Changes of growing media (peat, olive waste—OW, grape waste—GW and their mixtures) chemical properties (% of changes from initial to final material) after plant harvesting (at the end of the growing period).
